# Supplementary material for: Antifungal Activity and Molecular Mechanisms of Copper Nanoforms against Colletotrichum gloeosporioides
Source: MDPI journal article supplement (doi:10.3390/nano13232990), 2023-11-22
Supplement: s1 [file s1]

# Antifungal Activity and Molecular Mechanisms of Copper Nanoforms against *Colletotrichum gloeosporioides*

Mun'delanji C. Vestergaard <sup>1,\*</sup>, Yuki Nishida <sup>1</sup>, Lihn T.T. Tran <sup>1</sup>, Neha Sharma <sup>2</sup>, Xiaoxiao Zhang <sup>1</sup>, Masayuki Nakamura <sup>1</sup>, Auriane F. Oussou-Azo <sup>3</sup> and Tomoki Nakama <sup>1</sup>

<sup>1</sup> Faculty of Agriculture, Kagoshima University, Kagoshima City 890-0065, Japan; k8015687@kadai.jp (Y.N.); tranthaolinh030797@gmail.com (L.T.T.); xiaoxiao8812@icloud.com (X.Z.); masa@agri.kagoshima-u.ac.jp (M.N.); k4618101@kadai.jp (T.N.)

<sup>2</sup> Faculty of Fiber Science and Engineering, Kyoto Institute of Technology, Matsugasaki, Sakyo, Kyoto 606-8585, Japan; neha-sha@kit.ac.jp

<sup>3</sup> United Graduate School of Agricultural Sciences, Kagoshima University, Kagoshima City 890-0065, Japan; oauriane1@gmail.com

\* Correspondence: munde@agri.kagoshima-u.ac.jp

(A)

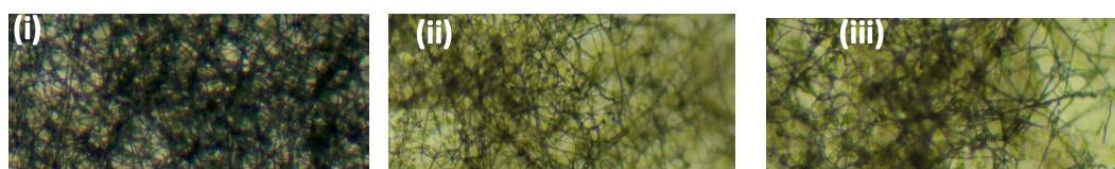

(B)

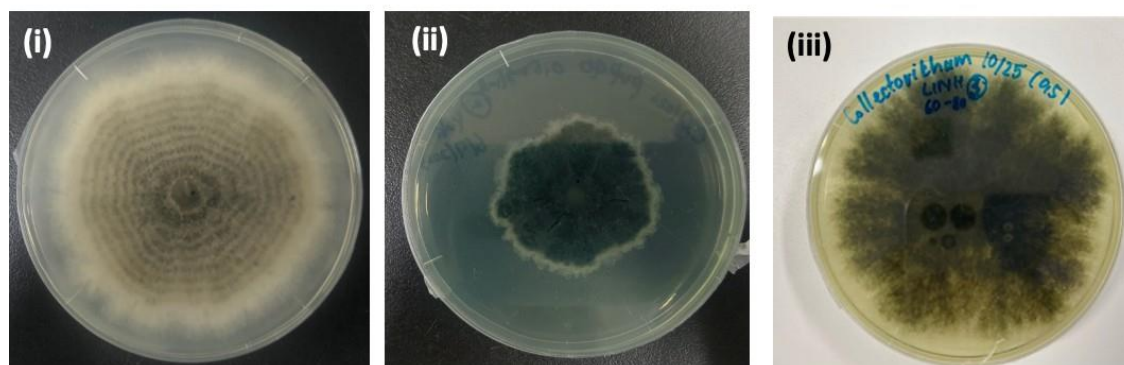

**Figure S1.** Effect of Cu-NFs on *C. gloeosporioides*, a fungal pathogen that attacks food crops (A) image of fungus (i) alone (Control); and in the presence of (ii) in-house Cu-NFs, (iii) commercial Cu-NFs, taken using an optical microscope at x25 magnification; (B) Photos of the fungus (i) Control; and in the presence of (ii) inhouse Cu-NFs (0.5mg/mL) and (iii) commercial Cu-NFs (0.5 mg/mL)

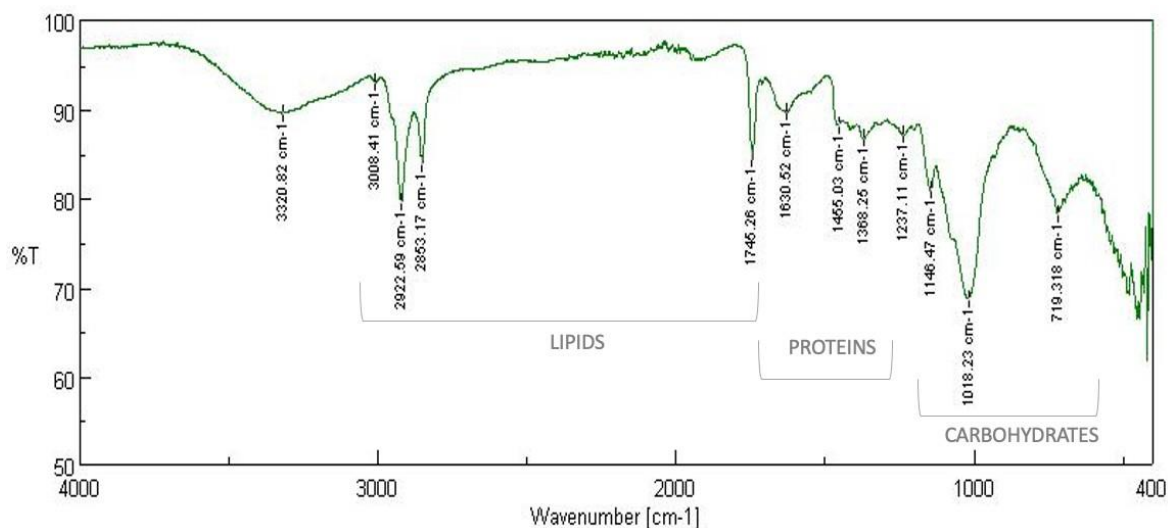

**Figure S2.** Interaction of *C. gloeosporioides* with Cu-NFs analysed using FTIR Spectra of fungal mycelium. FTIR analyses were conducted as described earlier.

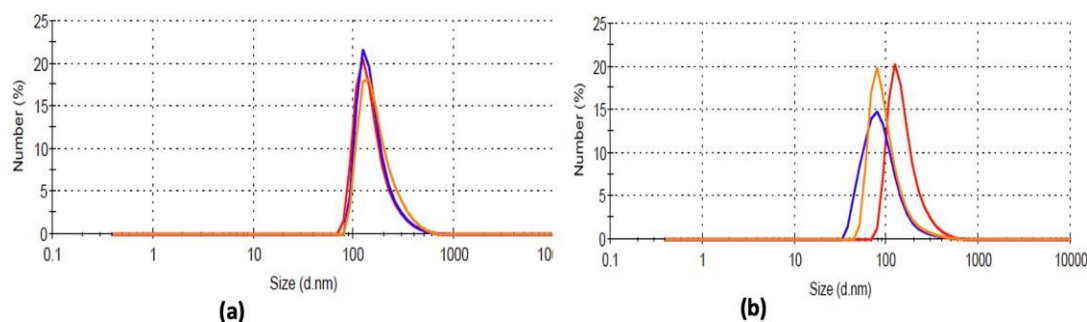

**Figure S3.** Size distribution of (a) aggregated copper and (b) copper oxide nanoforms analysed by DLS technique using a Zetasizer Nano ZS90 (Malvern Panalytical, Japan). All measurements were conducted in water at room temperature (25 °C) and t approximately 200 kcps count rate.
